# Supplementary material for: Effect of Climate Change on Invasion Risk of Giant African Snail (Achatina fulica Férussac, 1821: Achatinidae) in India
Source: PubMed Central journal article supplement (PMC4664396; doi:10.1371/journal.pone.0143724), 2015-11-30

**S4 Fig: Jackknife test of variable importance for *A.fulica* under RCP 8.5 scenario**

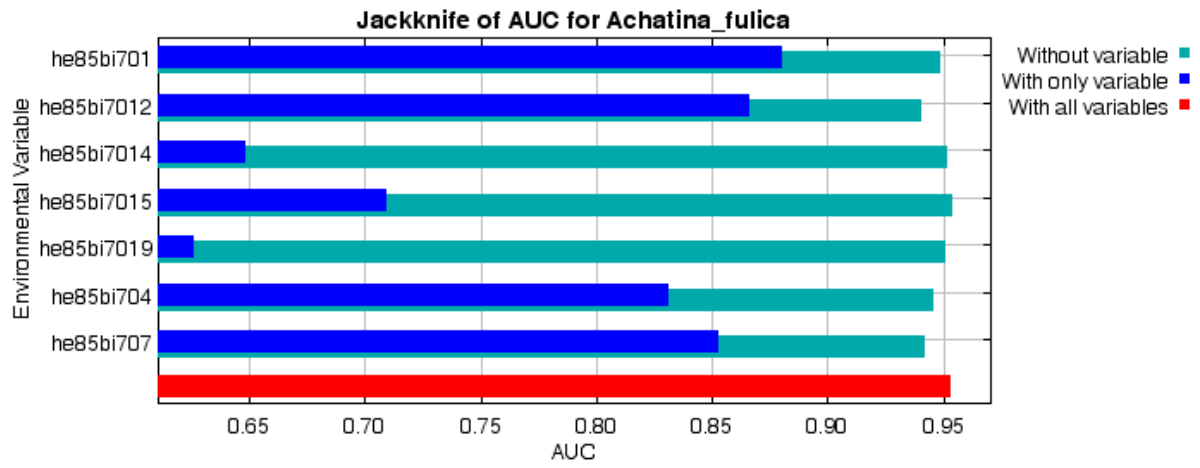

Supplement: pone.0143724.s004.pdf [file pone.0143724.s004.pdf]
