# Supplementary material for: Effect of Climate Change on Invasion Risk of Giant African Snail (Achatina fulica Férussac, 1821: Achatinidae) in India
Source: PubMed Central journal article supplement (PMC4664396; doi:10.1371/journal.pone.0143724), 2015-11-30
Supplement: pone.0143724.s005.pdf [file pone.0143724.s005.pdf]

**S1 Table: List of all Indian States with > 0.5 probability of invasion risk under different climate change scenarios. The values are in percentage**

| STATE                  | present | RCP 4.5 | RCP 6.0 | RCP 8.5 |
|------------------------|---------|---------|---------|---------|
| WEST BENGAL            | 87.93   | 78.65   | 75.83   | 76.08   |
| BIHAR                  | 80.58   | 81.01   | 80.67   | 82.27   |
| KERALA                 | 69.23   | 63.76   | 59.56   | 39.97   |
| ASSAM                  | 51.57   | 46.43   | 54.84   | 55.72   |
| TRIPURA                | 44.35   | 0.88    | 0.28    | 0.00    |
| JHARKHAND              | 41.71   | 57.83   | 50.85   | 55.05   |
| ANDAMAN NICKOBAR       | 40.41   | 55.15   | 53.80   | 77.44   |
| GOA                    | 30.48   | 2.51    | 0.00    | 0.00    |
| KARNATAKA              | 30.11   | 34.96   | 33.91   | 28.80   |
| LAKSHADWEEP            | 29.41   | 76.47   | 29.41   | 47.06   |
| MEGHALAYA              | 22.15   | 6.71    | 0.84    | 6.03    |
| ORISSA                 | 8.40    | 13.59   | 12.86   | 16.23   |
| TAMILNADU              | 7.97    | 4.35    | 3.11    | 3.61    |
| MIZORAM                | 5.07    | 2.08    | 5.64    | 2.82    |
| UTTAR PRADESH          | 3.06    | 2.26    | 1.52    | 2.41    |
| MAHARASHTRA            | 2.95    | 1.64    | 3.01    | 1.74    |
| PONDICHERRY            | 1.70    | 1.68    | 1.68    | 1.68    |
| MANIPUR                | 1.46    | 0.00    | 0.27    | 0.01    |
| ANDHRA PRADESH         | 1.46    | 3.77    | 3.89    | 5.47    |
| SIKKIM                 | 0.51    | 0.00    | 0.01    | 0.00    |
| NAGALAND               | 0.48    | 3.09    | 7.11    | 4.78    |
| ARUNACHAL PRADESH      | 0.44    | 0.30    | 0.58    | 0.25    |
| CHANDIGARH             | 0.00    | 0.00    | 0.00    | 0.00    |
| CHHATTISGARH           | 0.00    | 0.00    | 0.00    | 0.02    |
| DADRA AND NAGAR HAVELI | 0.00    | 0.00    | 10.16   | 0.00    |
| DAMAN AND DIU          | 0.00    | 0.00    | 21.28   | 0.00    |
| DELHI                  | 0.00    | 0.00    | 0.00    | 0.00    |
| GUJARAT                | 0.00    | 2.01    | 2.14    | 2.03    |
| HARYANA                | 0.00    | 0.00    | 0.00    | 0.00    |
| HIMACHAL PRADESH       | 0.00    | 0.00    | 0.00    | 0.07    |
| JAMMU & KASHMIR        | 0.00    | 0.00    | 0.00    | 0.00    |
| MADHYA PRADESH         | 0.00    | 0.00    | 0.00    | 0.00    |
| PUNJAB                 | 0.00    | 0.00    | 0.00    | 0.00    |
| RAJASTHAN              | 0.00    | 0.00    | 0.03    | 0.00    |
| UTTARAKHAND            | 0.00    | 0.06    | 0.00    | 0.06    |
